# Supplementary material for: Structural and Thermodynamic Understandings in Mn‐Based Sodium Layered Oxides during Anionic Redox
Source: PubMed Central journal article supplement (PMC7435253; doi:10.1002/advs.202001263), 2020-07-02
Supplement: ADVS-7-2001263-s001.pdf [file ADVS-7-2001263-s001.pdf]

## Supporting Information

### **Structural and Thermodynamic Understandings in Mn-Based Sodium Layered Oxides during Anionic Redox**

*Seok Mun Kang<sup>†</sup>, Duho Kim<sup>†</sup>, Kug-Seung Lee, Min-Seob Kim, Aihua Jin, Jae-Hyuk Park, Chi-Yeong Ahn, Tae-Yeol Jeon, Young Hwa Jung, Seung-Ho Yu, \* Junyoung Mun, \* and Yung-Eun Sung\**

/

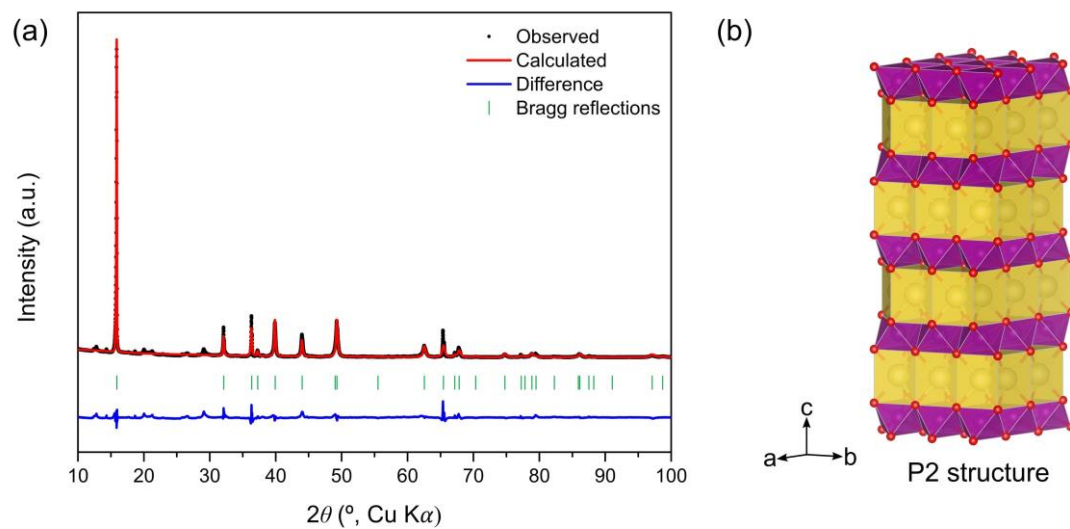

**Figure S1.** Structure analysis of NLMO. a) X-ray powder diffraction data for NLMO refined using b) the P2-type layered Na<sub>x</sub>TMO<sub>2</sub> structure (S.G. P6<sub>3</sub>/mmc). Rietveld refinement was carried out using GSAS software.

**Table S1** Refined crystallographic parameters of NLMO from Rietveld refinement.

---

**S. G.  $P6_3/mmc$ ,  $a = b = 2.8492(1) \text{ \AA}$ ,  $c = 11.1372(6) \text{ \AA}$ ,  $V = 78.298(8) \text{ \AA}^3$ ,  $R_{wp} = 2.90\%$**

---

| Site       | Mult. | x   | y   | Z        | Occ.                 | $U_{iso}$               |
|------------|-------|-----|-----|----------|----------------------|-------------------------|
| <b>Mn1</b> | 2     | 0   | 0   | 0        | 0.806 <sup>a</sup>   | 0.0081(15) <sup>b</sup> |
| <b>Li1</b> | 2     | 0   | 0   | 0        | 0.194 <sup>a</sup>   | 0.0081(15) <sup>b</sup> |
| <b>O1</b>  | 4     | 1/3 | 2/3 | 0.088(2) | 1                    | 0.057(15)               |
| <b>Na1</b> | 2     | 1/3 | 2/3 | 1/4      | 0.28(4) <sup>a</sup> | 0.041(14) <sup>b</sup>  |
| <b>Na2</b> | 2     | 0   | 0   | 1/4      | 0.32(4) <sup>a</sup> | 0.041(14) <sup>b</sup>  |

---

<sup>a</sup>The occupancies of Mn, Na, and Li are based on the ICP result.

<sup>b</sup> $U_{iso}$  values for each atom in the same layer are assumed to be equal.

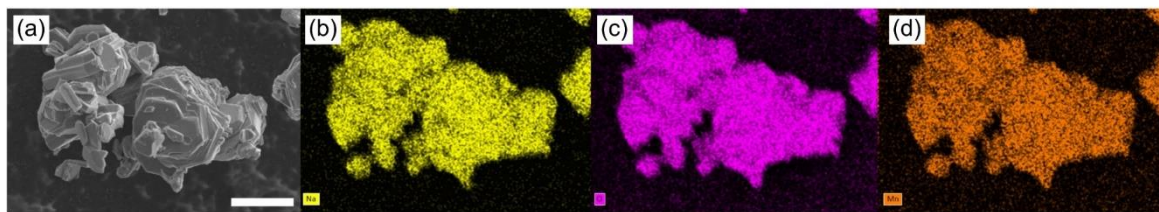

**Figure S2.** Morphology and elemental distributions of NLMO. a) FE-SEM image and elemental mapping of b) Na, c) O, and d) Mn for NLMO. The scale is 6  $\mu\text{m}$  for all the individual images.

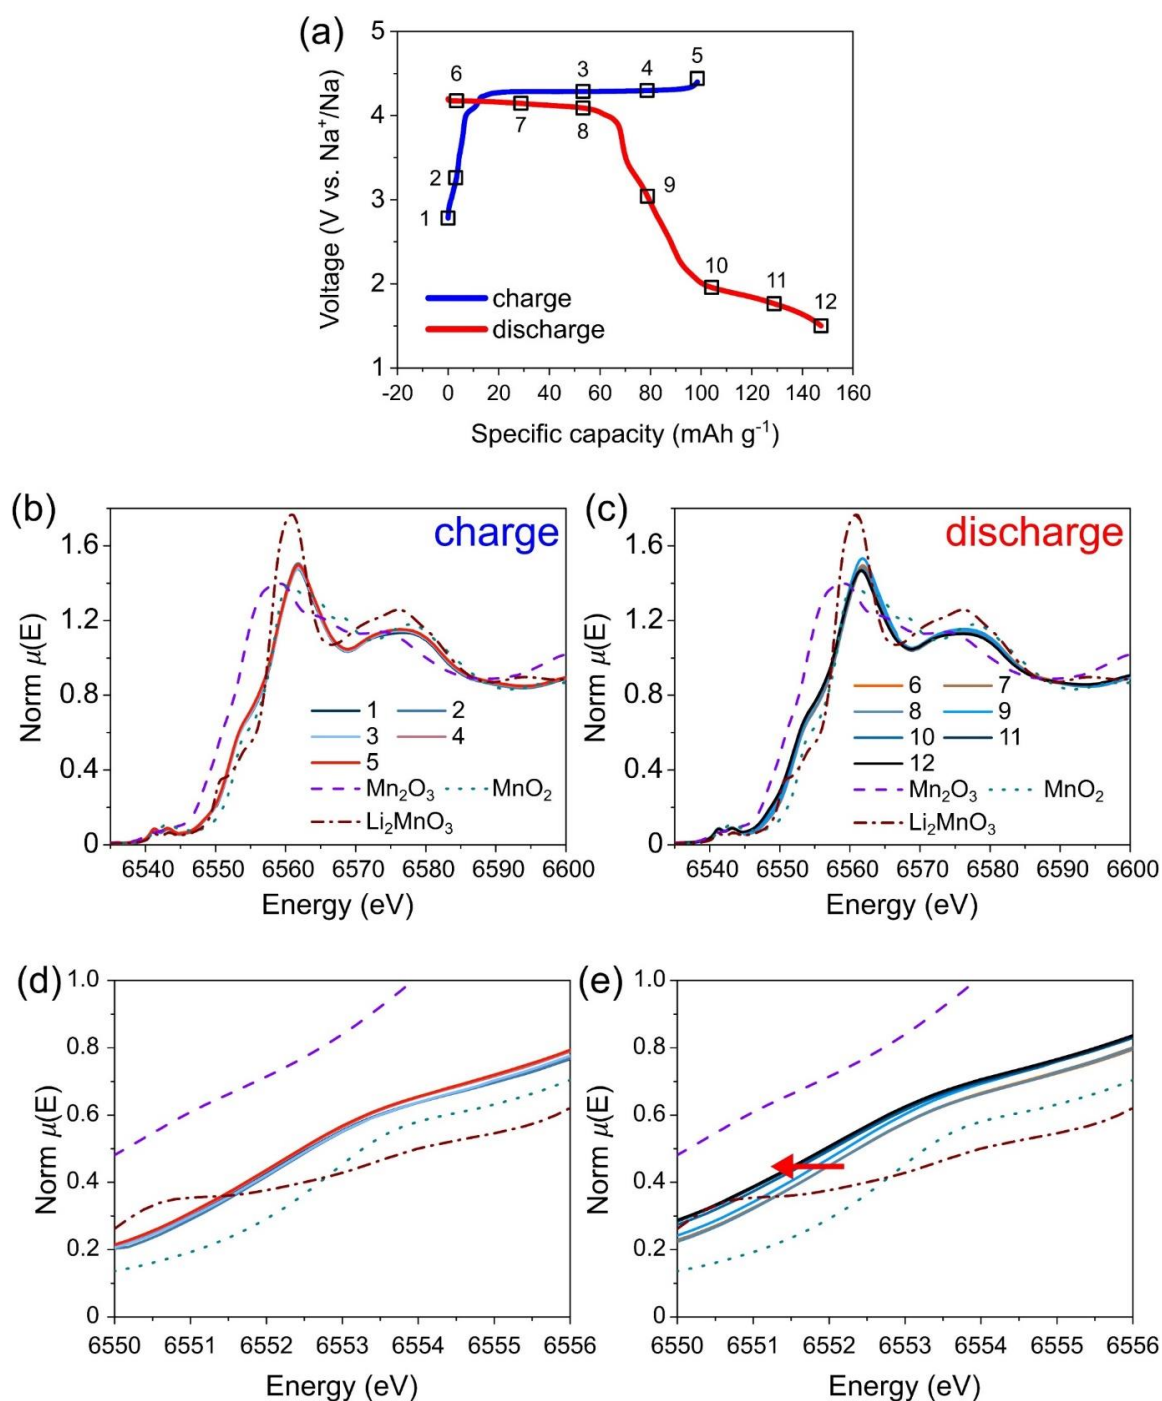

**Figure S3.** *In situ* XAS analysis at the Mn K-edge of NLMO during the first electrochemical cycle. a) The charge/discharge profile of Na/ NLMO cell at a rate of 30 mA g<sup>-1</sup> between 1.5 and 4.4 V during the *in situ* measurement. Evolution of the Mn K-edge XANES spectra upon b) charging and c) discharging. d,e) Enlarged spectra at the edge region corresponding to the XANES spectra of b,c), respectively. Mn K-edge XANES spectra of Mn<sub>2</sub>O<sub>3</sub> (Mn<sup>3+</sup>), MnO<sub>2</sub> (Mn<sup>4+</sup>), and Li<sub>2</sub>MnO<sub>3</sub> (Mn<sup>4+</sup>) are presented for reference. The numbers in Figure S3b, c, and f indicate the measurement points corresponding to those in Figure S3a.

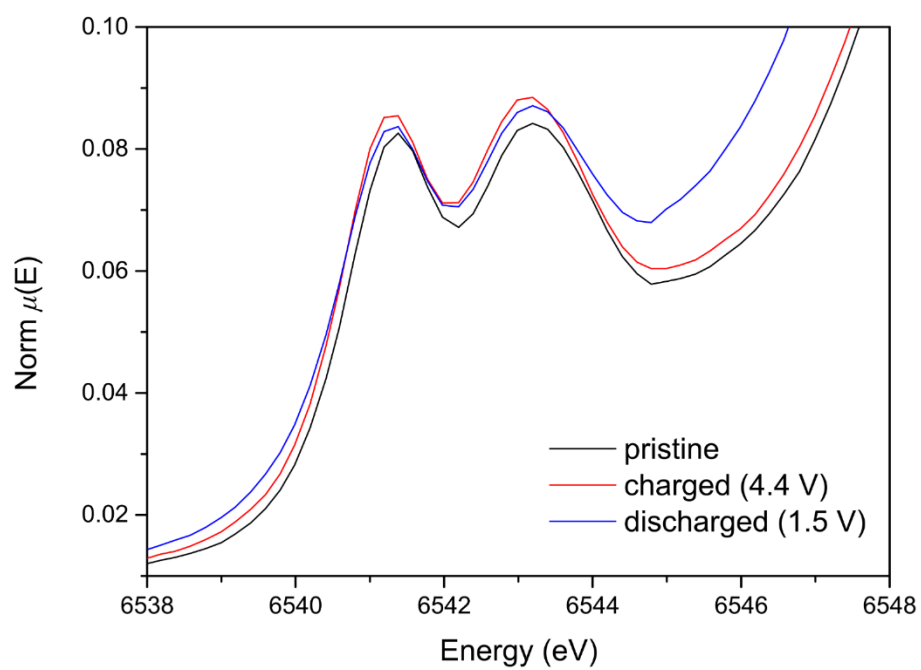

**Figure S4.** Comparison of the Mn K-edge pre-edge normalized XANES spectra of pristine, charged (4.4 V), and discharged (1.5 V) states of NLMO.

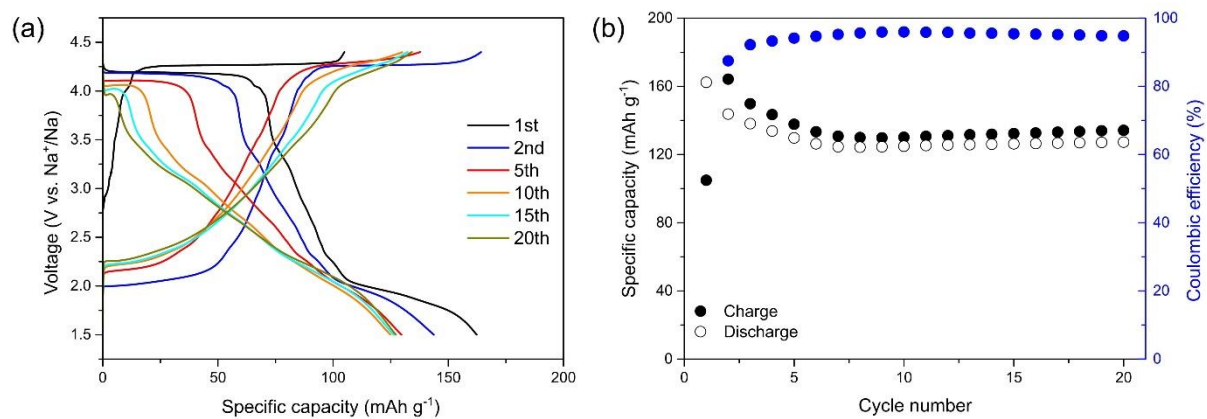

**Figure S5.** Electrochemical cycling performance of Na/NLMO cell. a) Charge/discharge profiles of NLMO during 20 cycles. b) Specific capacity and Coulombic efficiency of Na/NLMO cell as a function of cycle number.

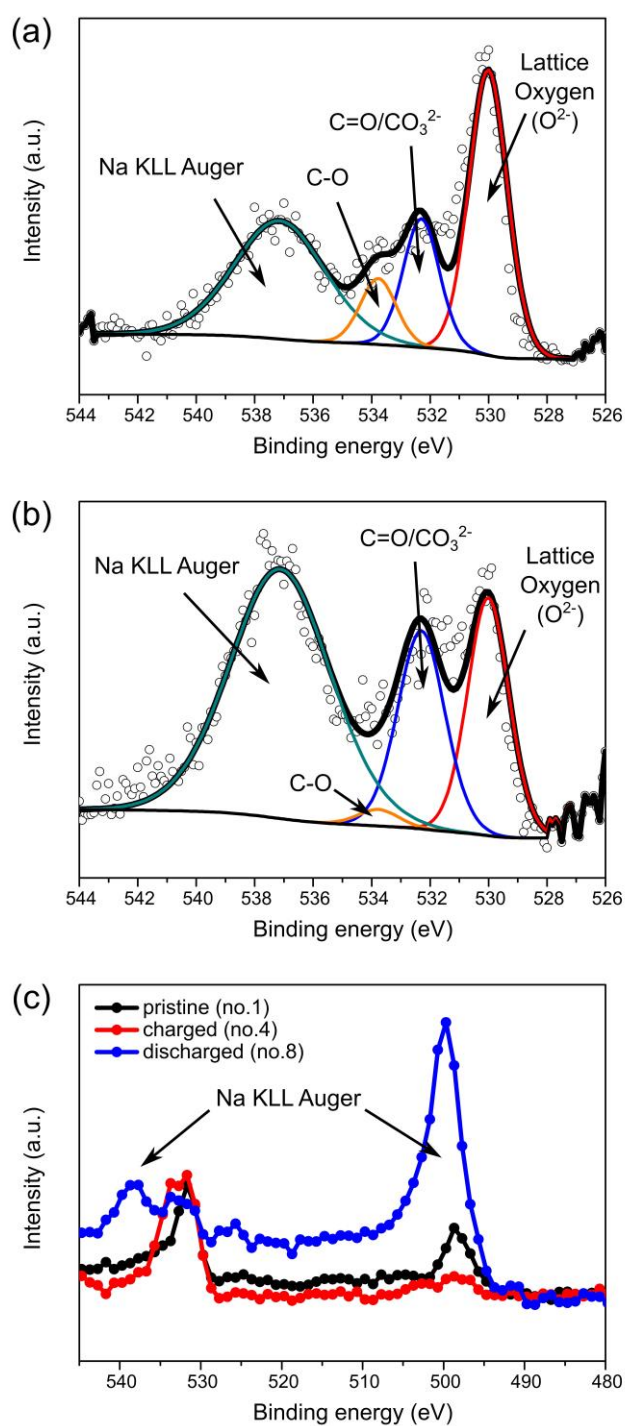

**Figure S6.** XPS  $O1s$  peak fitting results of a) no.7 and b) no.8 states in Figure 3. c) Evolution of Na KLL Auger peaks during the first charge and discharge process.
